# Supplementary material for: Ultrasonic-assisted, additive-free Pd-catalyzed Suzuki–Miyaura cross-coupling enabled synthesis of novel arylated benzofuran-triazole hybrids
Source: Frontiers journal article supplement (doi:10.3389/fchem.2025.1726528), 2025-12-10
Supplement: Data_Sheet_1.pdf [file Data_Sheet_1.pdf]

**Supporting Information for**  
**Ultrasonic-assisted, additive-free Pd-catalyzed Suzuki-Miyaura cross-**  
**coupling enabled synthesis of novel arylated benzofuran-triazole**  
**hybrids**

**Table of Contents**

**1. NMR characterization of synthesized hybrids**

**Figure S 1.1:**  $^1\text{H}$ -NMR Spectra of compound **13a**.

**Figure S 1.2:**  $^{13}\text{C}$ -NMR Spectra of compound **13a**.

**Figure S 1.3:**  $^1\text{H}$ -NMR Spectra of compound **13b**.

**Figure S 1.4:**  $^{13}\text{C}$ -NMR Spectra of compound **13b**.

**Figure S 1.5:**  $^1\text{H}$ -NMR Spectra of compound **13c**.

**Figure S 1.6:**  $^{13}\text{C}$ -NMR Spectra of compound **13c**.

**Figure S 1.7:**  $^1\text{H}$ -NMR Spectra of compound **13d**.

**Figure S 1.8:**  $^{13}\text{C}$ -NMR Spectra of compound **13d**.

**Figure S 1.9:**  $^1\text{H}$ -NMR Spectra of compound **13e**.

**Figure S 1.10:**  $^{13}\text{C}$ -NMR Spectra of compound **13e**.

**Figure S 1.11:**  $^1\text{H}$ -NMR Spectra of compound **13f**.

**Figure S 1.12:**  $^{13}\text{C}$ -NMR Spectra of compound **13f**.

**Figure S 1.13:**  $^1\text{H}$ -NMR Spectra of compound **13g**.

**Figure S 1.14:**  $^{13}\text{C}$ -NMR Spectra of compound **13g**.

**Figure S 1.15:**  $^1\text{H}$ -NMR Spectra of compound **13h**.

**Figure S 1.16:**  $^{13}\text{C}$ -NMR Spectra of compound **13h**.

**Figure S 1.17:**  $^1\text{H}$ -NMR Spectra of compound **13i**.

**Figure S 1.18:**  $^{13}\text{C}$ -NMR Spectra of compound **13**

## **NMR Spectra**

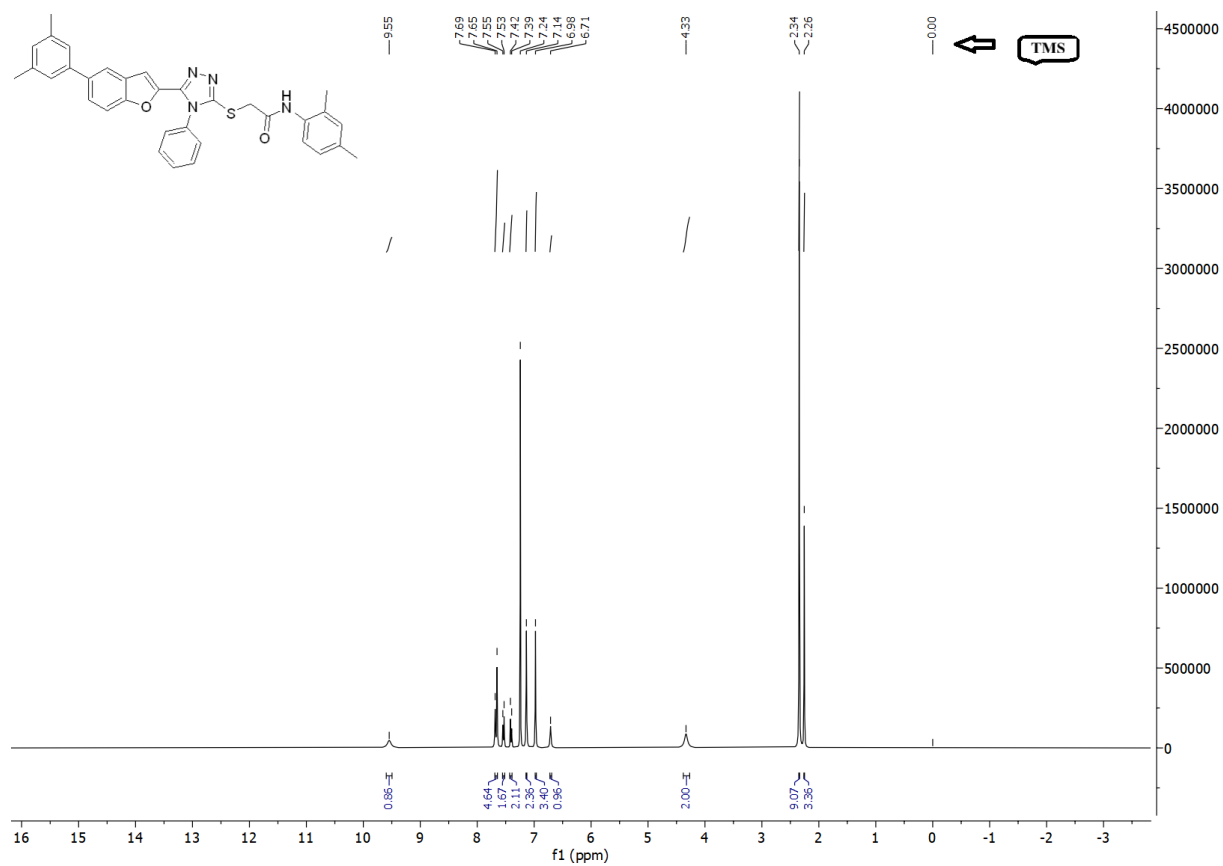

**Figure S 1.1:**  $^1\text{H}$ -NMR Spectra of compound **13a**.

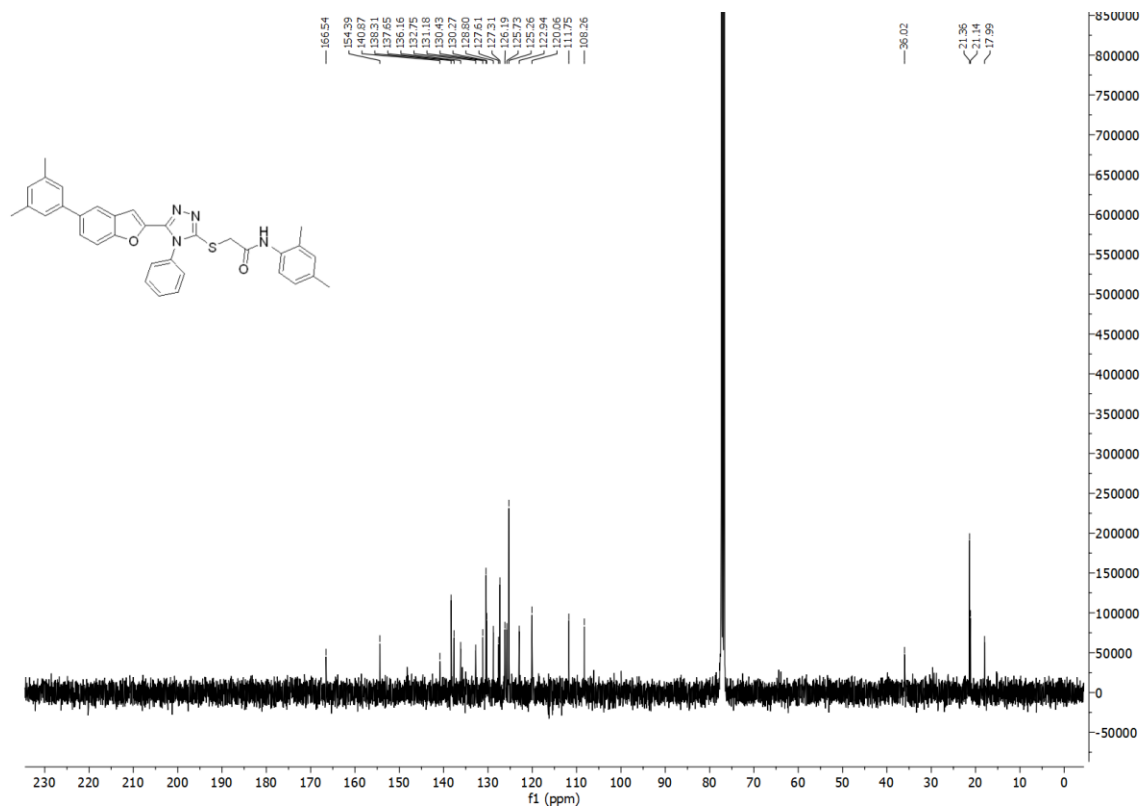

**Figure S 1.2:**  $^{13}\text{C}$ -NMR Spectra of compound **13a**.

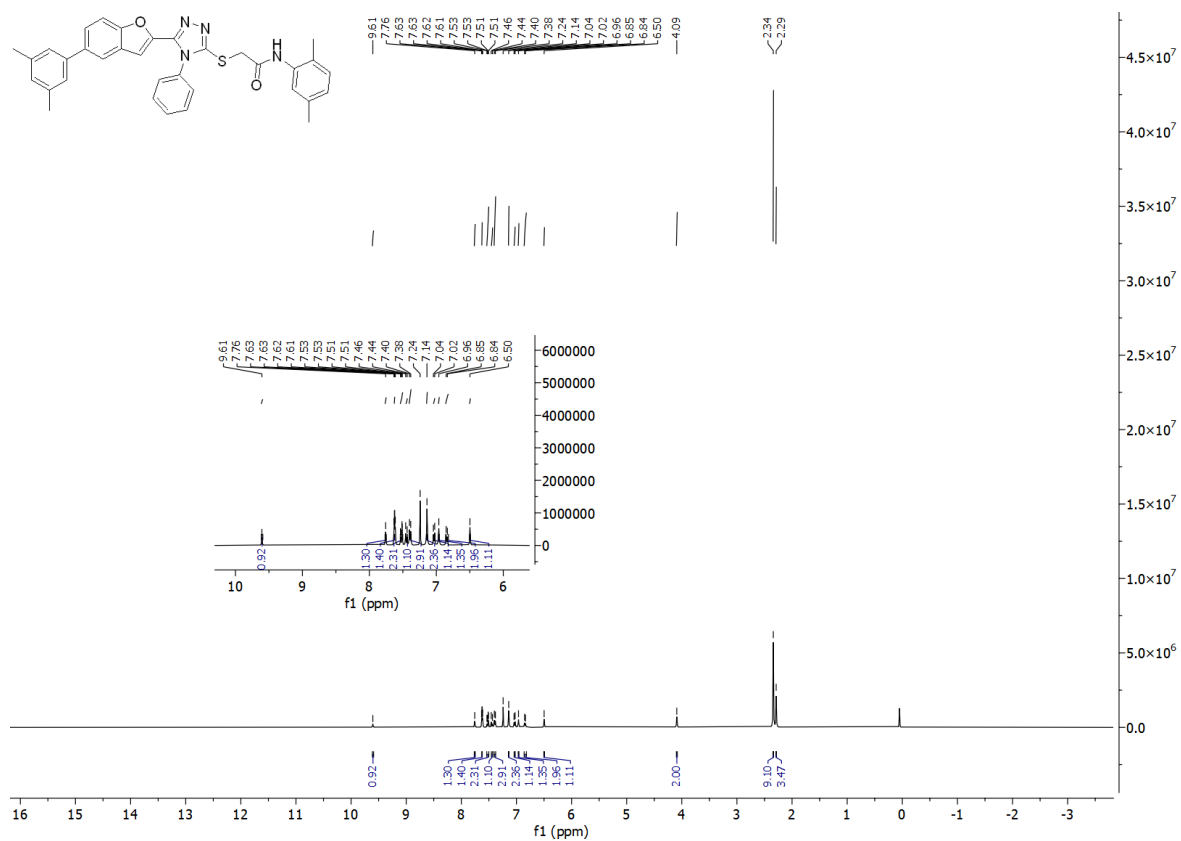

**Figure S 1.3:**  $^1\text{H}$ -NMR Spectra of compound **13b**.

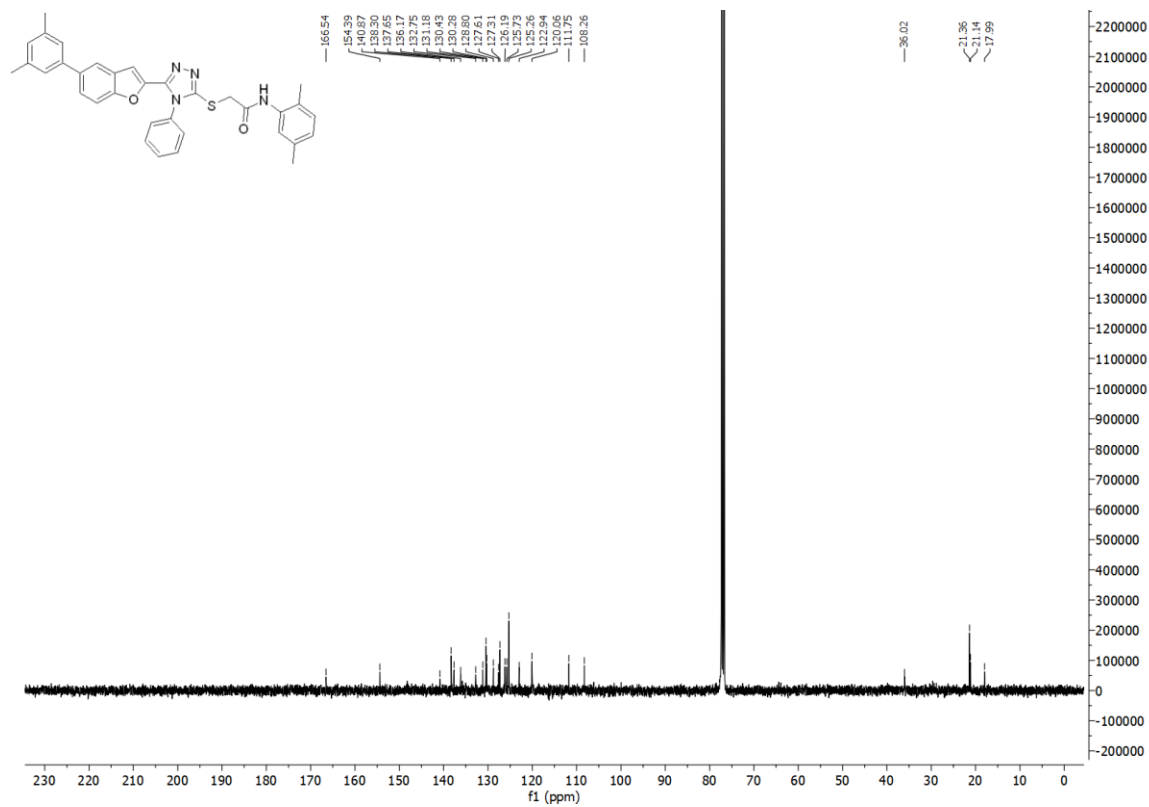

**Figure S 1.4:**  $^{13}\text{C}$ -NMR Spectra of compound **13b**.

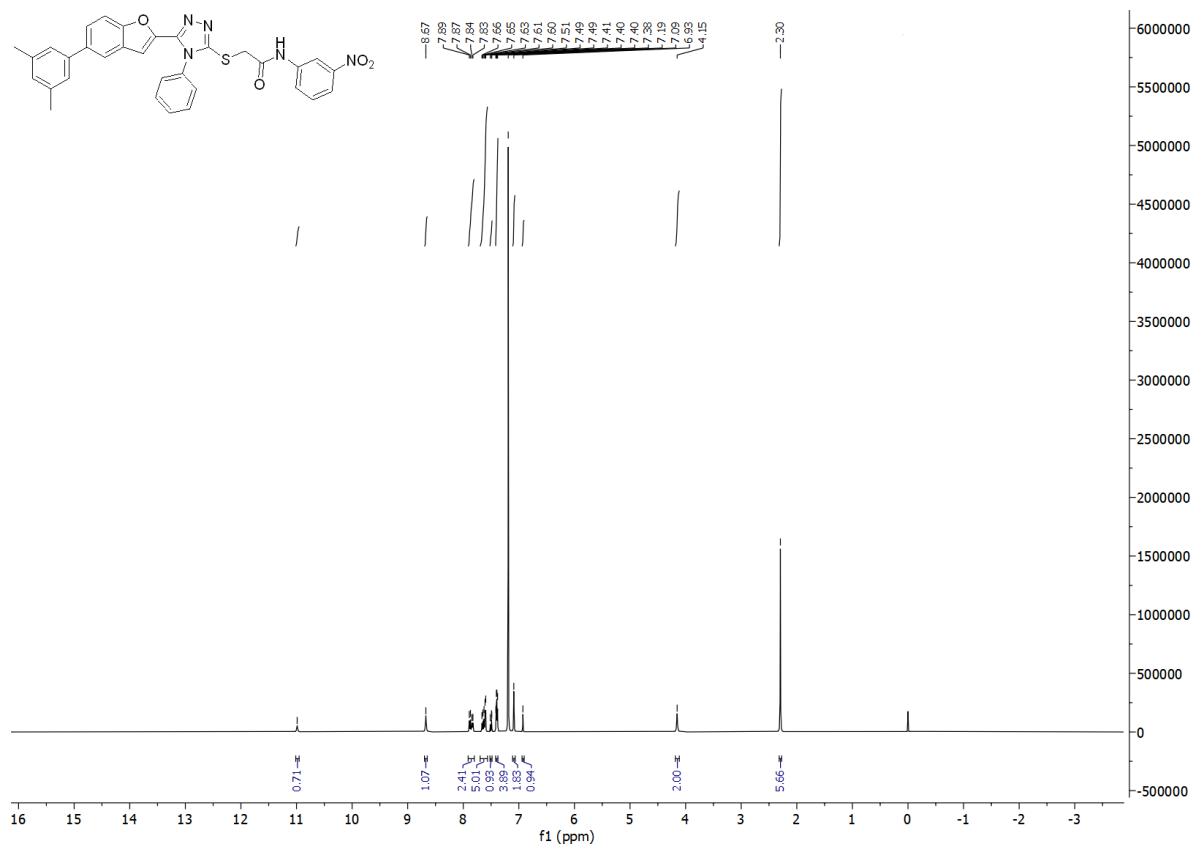

**Figure S 1.5:** <sup>1</sup>H-NMR Spectra of compound **13c**.

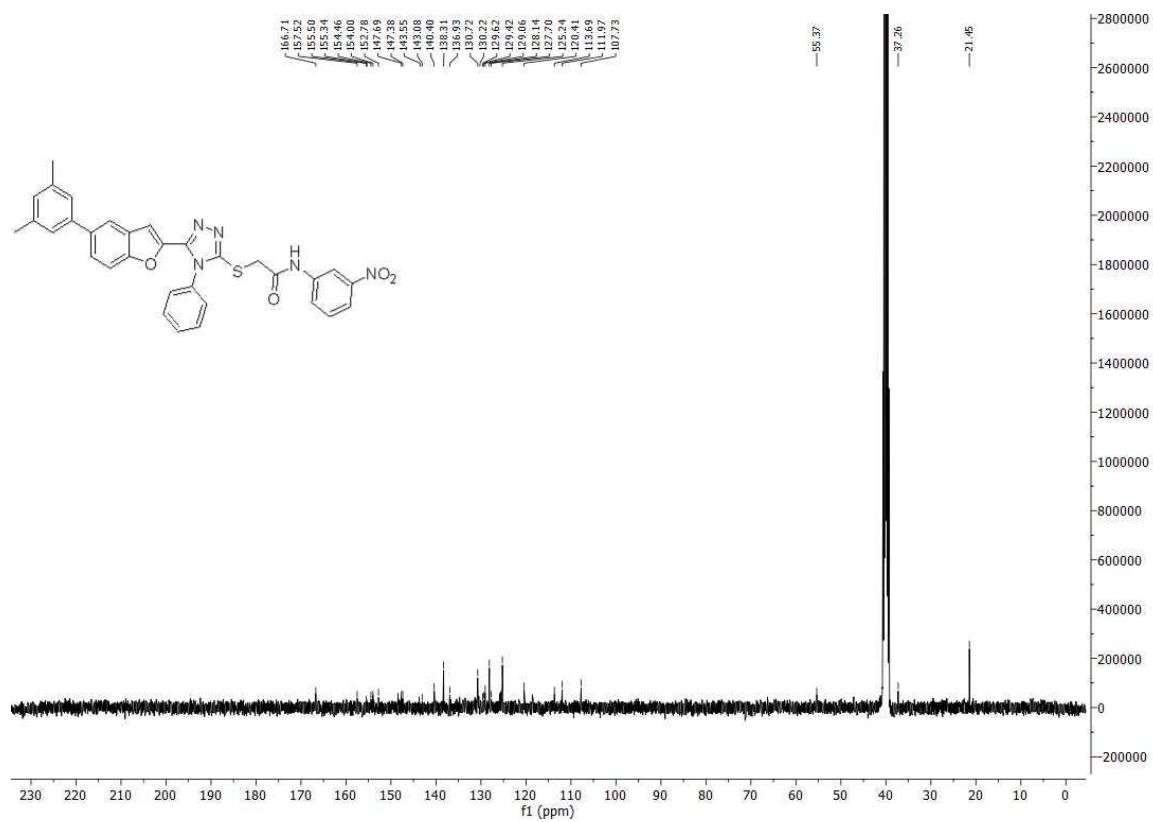

**Figure S 1.6:** <sup>13</sup>C-NMR Spectra of compound 13c.



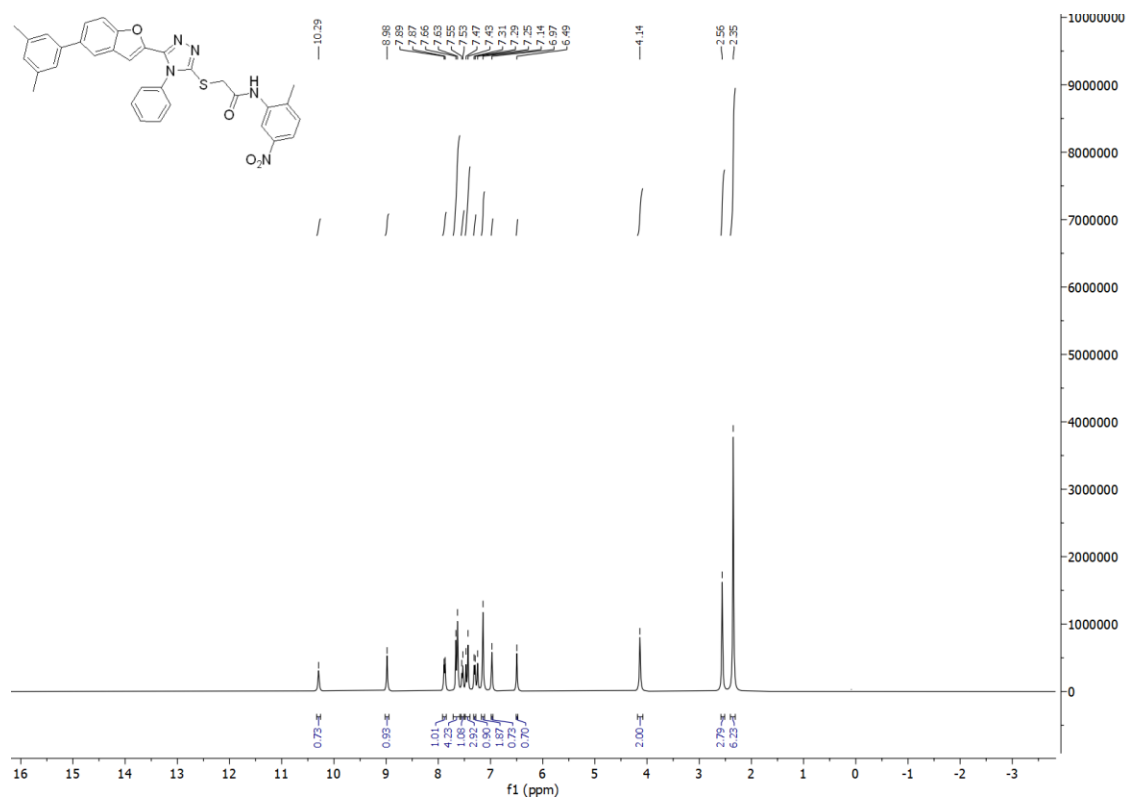

**Figure S 1.7:**  $^1\text{H}$ -NMR Spectra of compound **13d**.

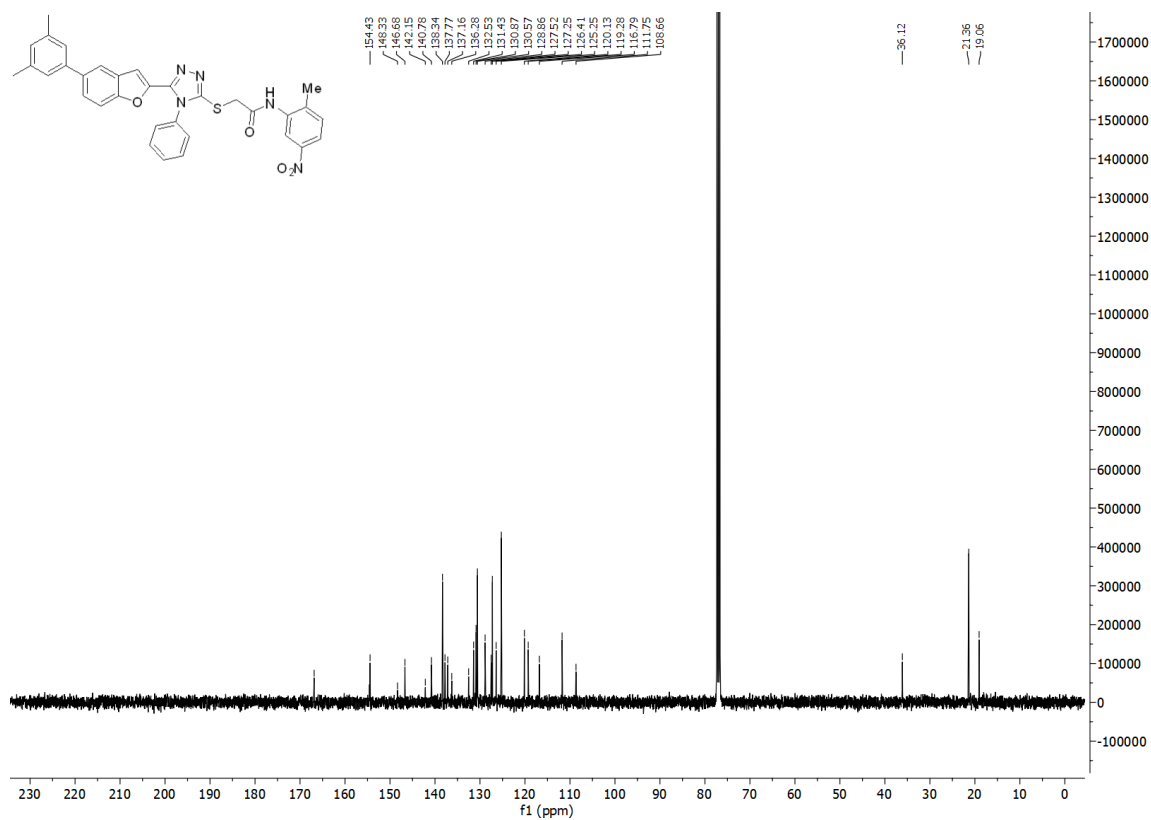

**Figure S 1.8:** <sup>13</sup>C-NMR Spectra of compound **13d**.

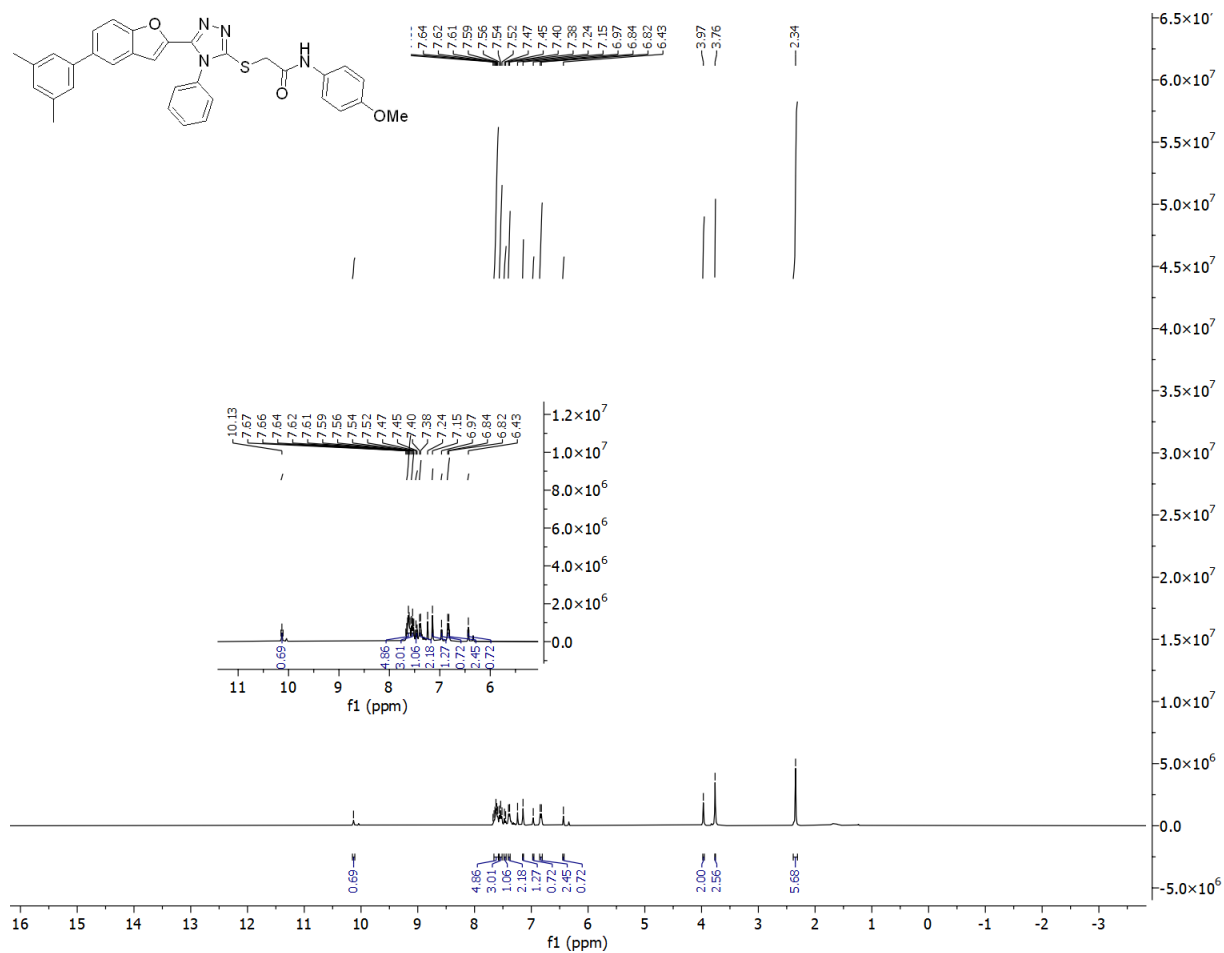

**Figure S 1.9:** <sup>1</sup>H-NMR Spectra of compound **13e**.

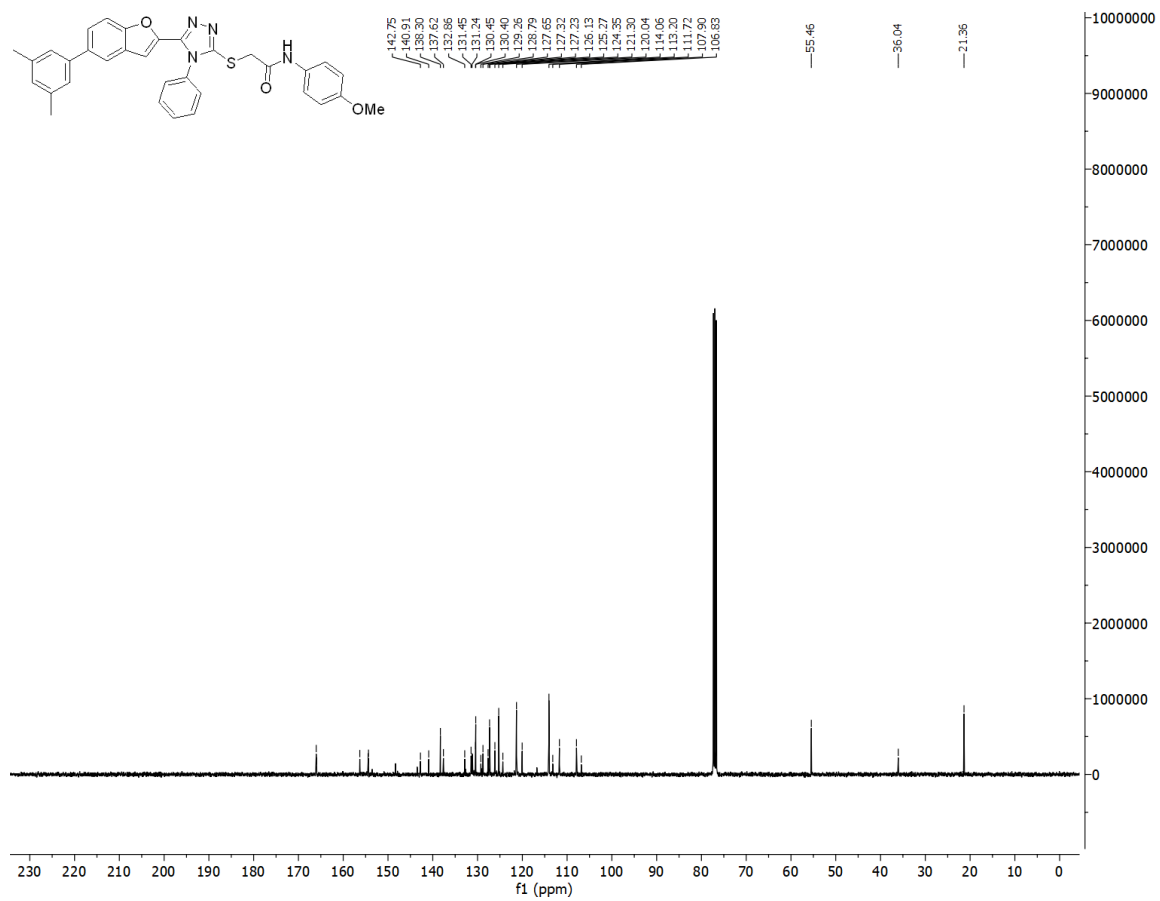

**Figure S 1.10:**  $^{13}\text{C}$ -NMR Spectra of compound **13e**.

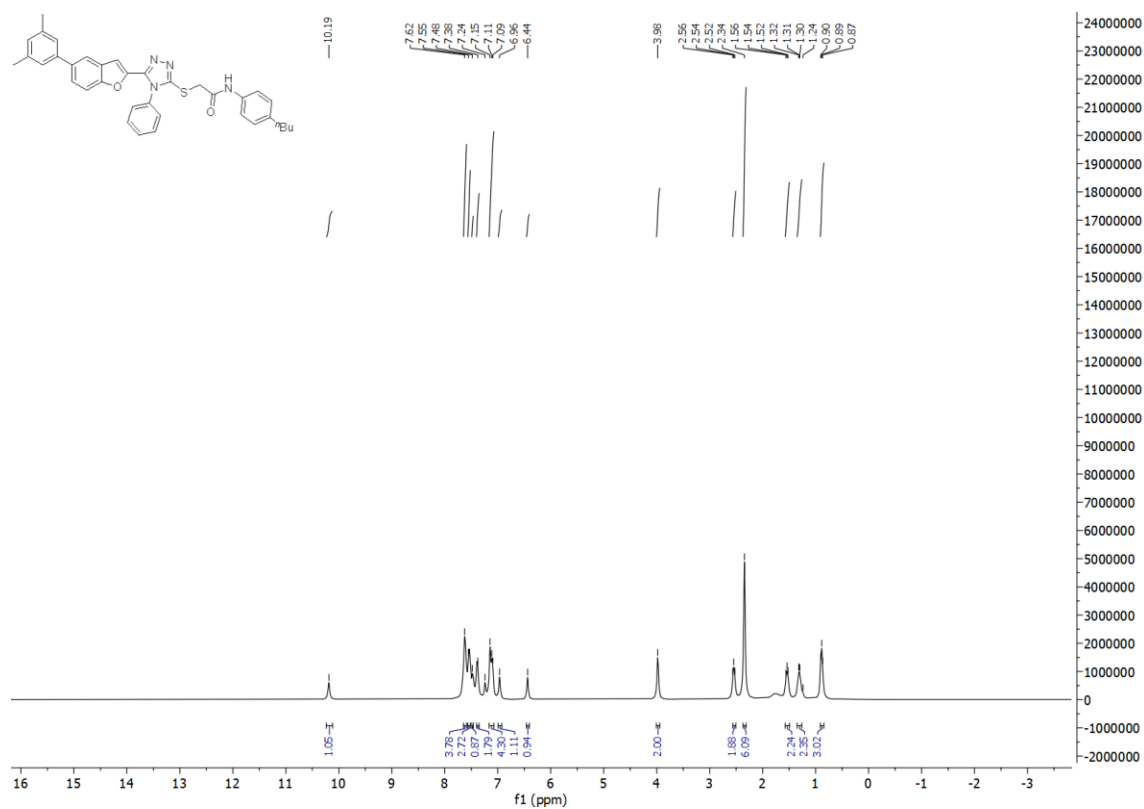

**Figure S 1.11:**  $^1\text{H}$ -NMR Spectra of compound **13f**.

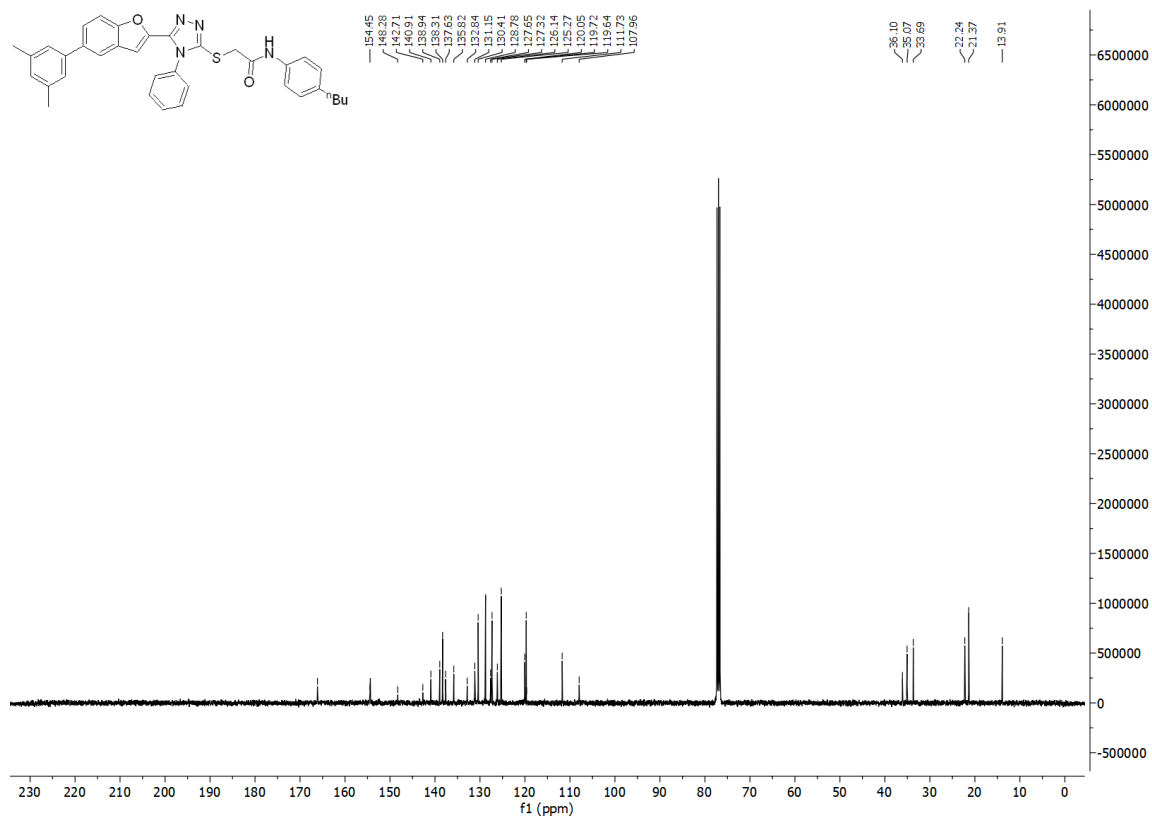

**Figure S 1.12:**  $^{13}\text{C}$ -NMR Spectra of compound **13f**.

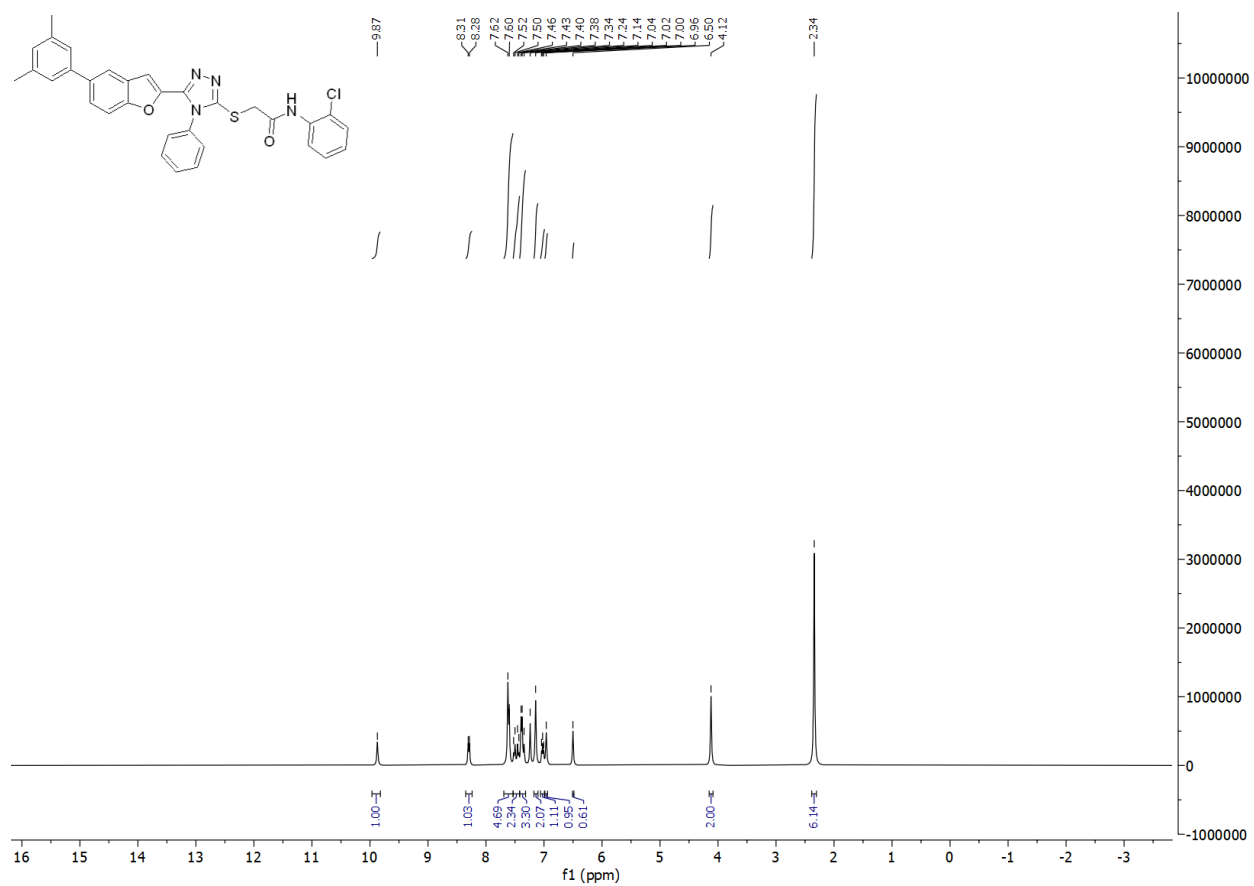

**Figure S 1.13:** <sup>1</sup>H-NMR Spectra of compound **13g**.

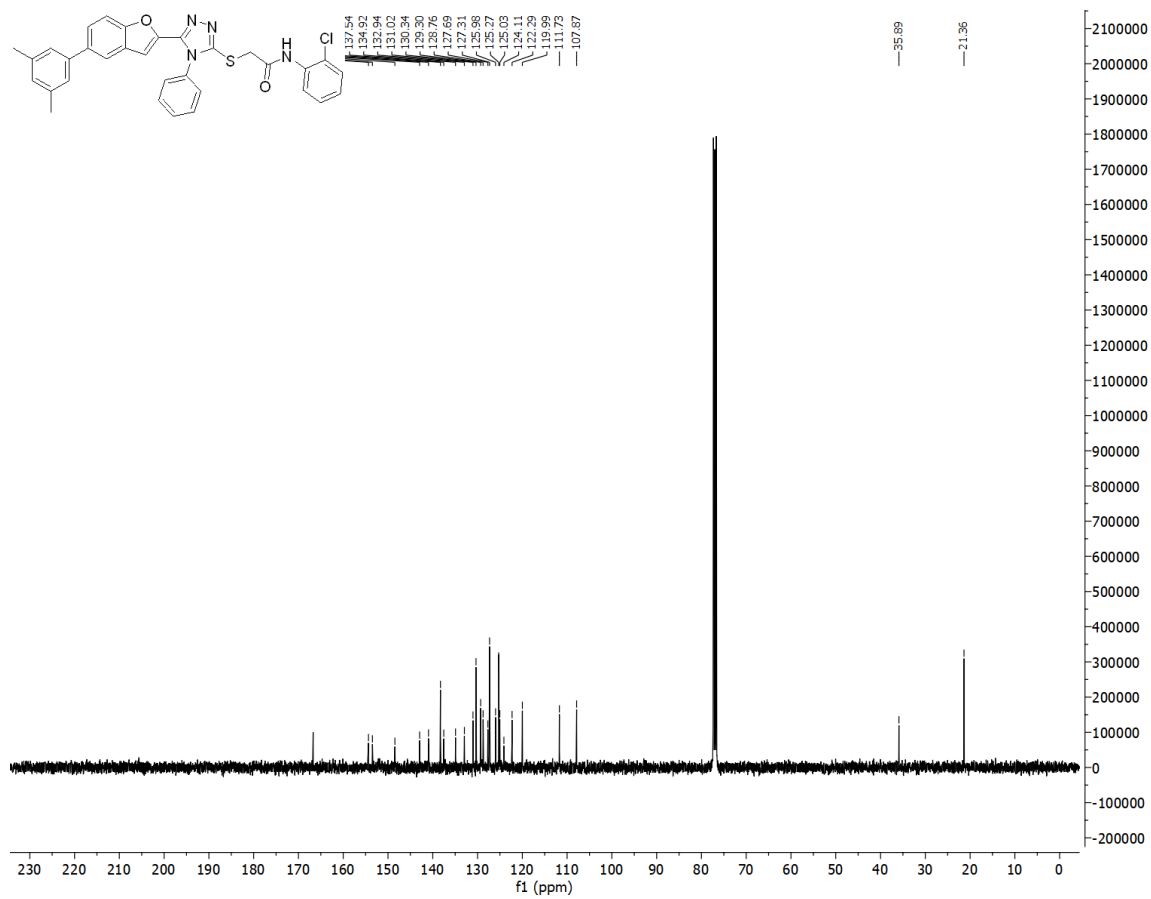

**Figure S 1.14:**  $^{13}\text{C}$ -NMR Spectra of compound **13g**.



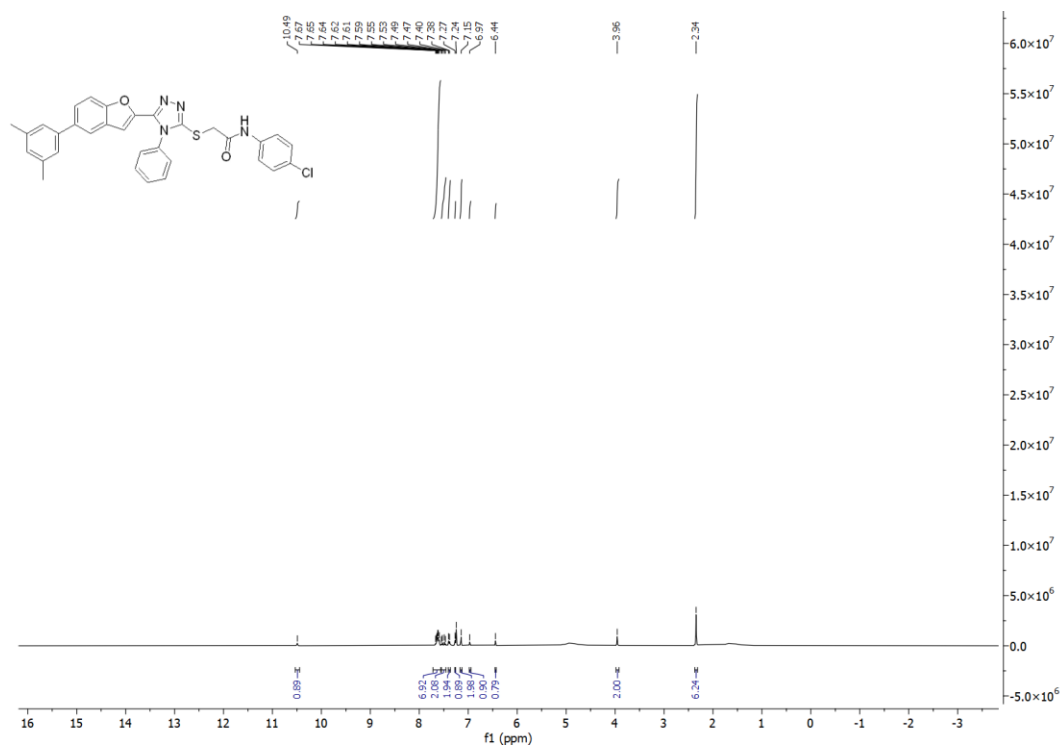

**Figure S 1.15:** <sup>1</sup>H-NMR Spectra of compound **13h**.

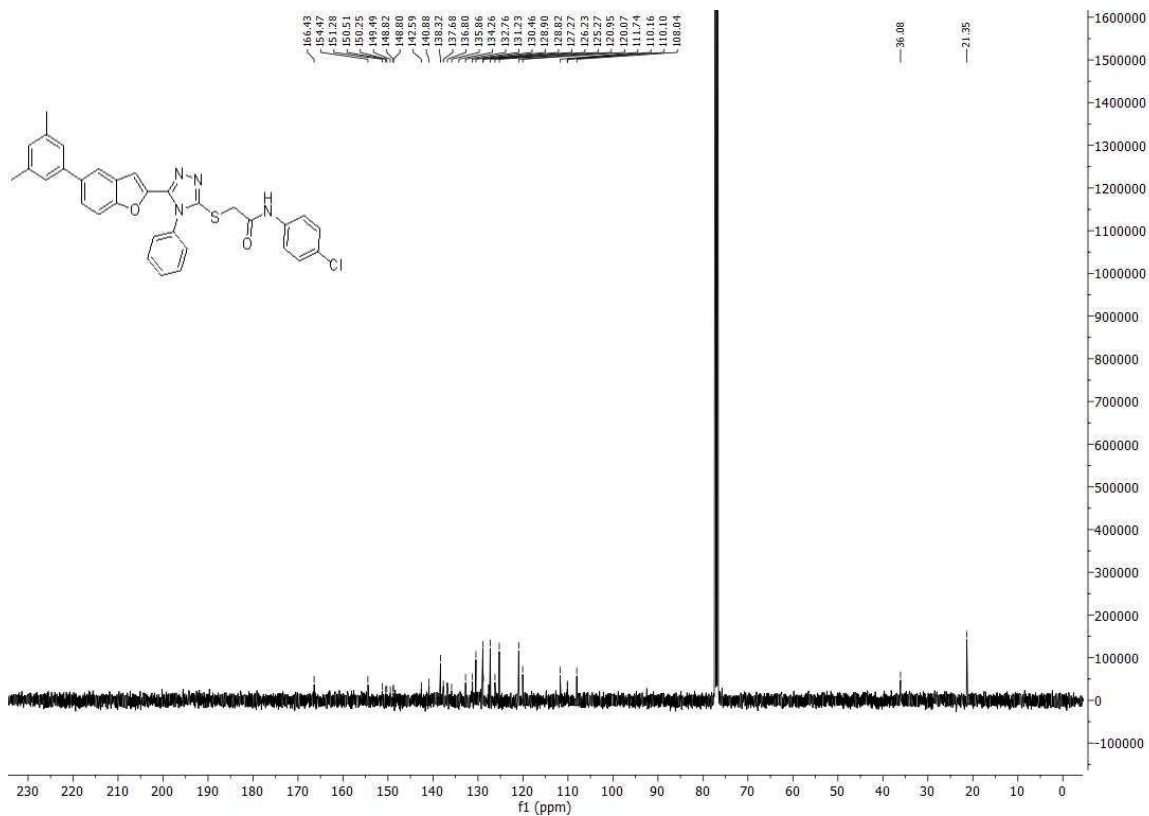

**Figure S 1.16:**  $^{13}\text{C}$ -NMR Spectra of compound **13h**.

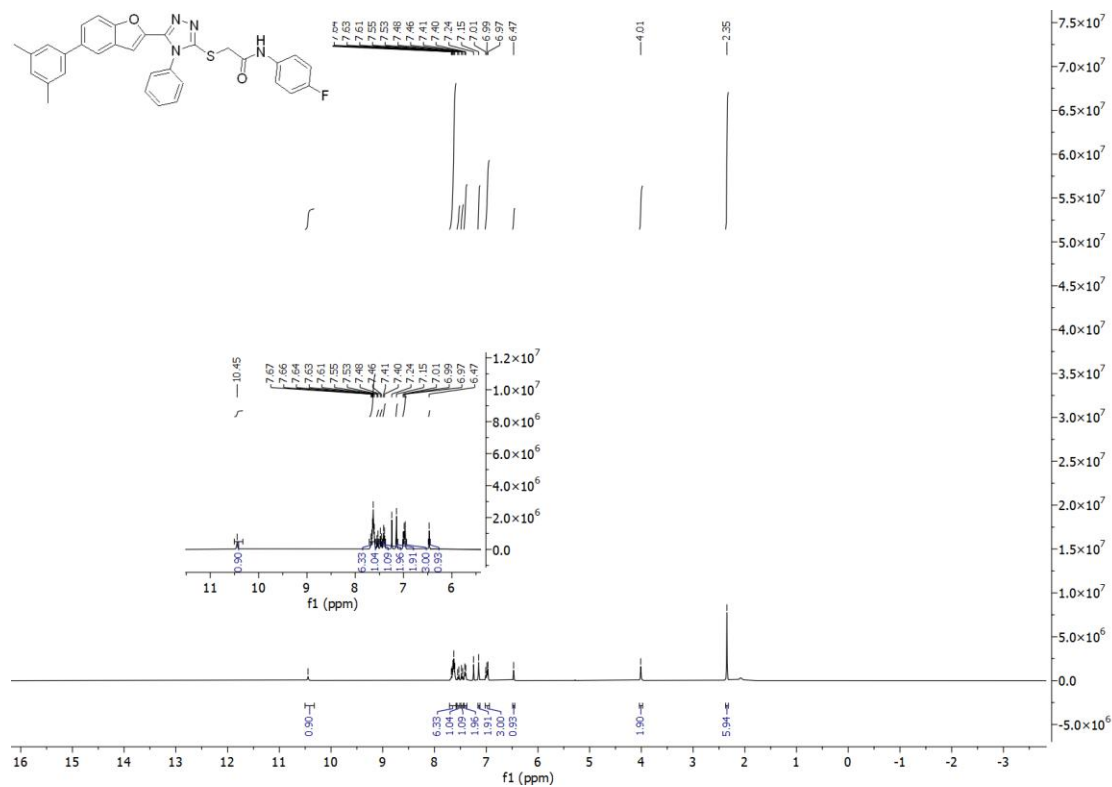

**Figure S 1.17:**  $^1\text{H}$ -NMR Spectra of compound **13i**.

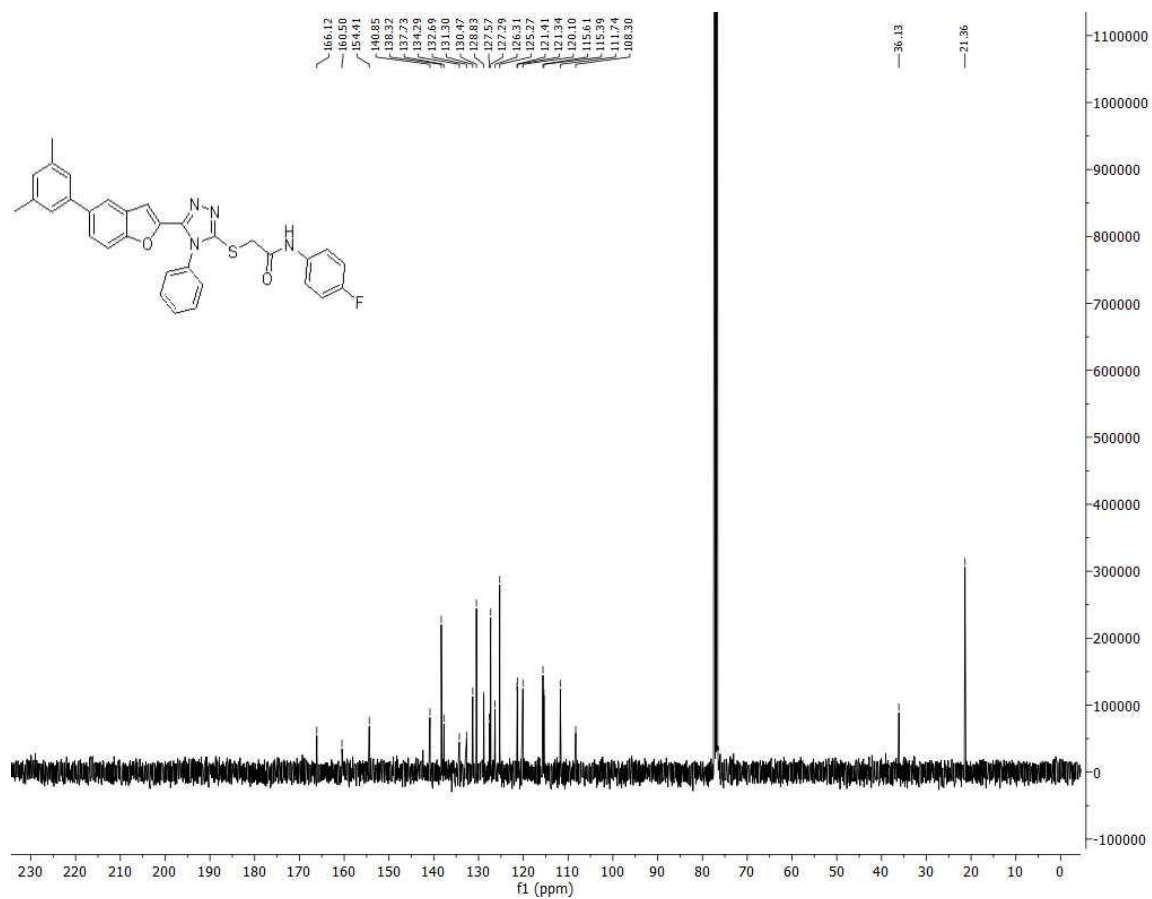

**Figure S 1.18:** <sup>13</sup>C-NMR Spectra of compound **13i**.
